# Supplementary material for: A nurse-led health coaching intervention for stroke survivors and their family caregivers in hospital to home transition care in Chongqing, China: a study protocol for a randomized controlled trial
Source: Springer Nature journal article supplement (doi:10.1186/s13063-020-4156-z), 2020-03-04
Supplement: MOESM3 [file 17770728]

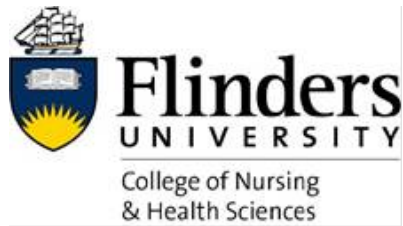

## Consent Form (Stroke survivors Version)

**Interventional Study - Adult providing own consent**

**Title:** A nurse-led health coaching intervention for stroke survivors and their family caregivers in hospital to home transition care in Chongqing

**Coordinating Principal Investigator/ Principal Investigator:**

A/professor Lily Xiao  
College of Nursing and Health Science, Flinders University  
Email: [lily.xiao@flinders.edu.au](mailto:lily.xiao@flinders.edu.au)

**Associate Investigator(s):**

A/Professor Diane Chamberlain  
College of Nursing and Health Science, Flinders University  
Email: [di.chamberlain@flinders.edu.au](mailto:di.chamberlain@flinders.edu.au)

PhD Candidate Shuanglan Lin  
College of Nursing and Health Science, Flinders University  
Email: [lin0286@flinders.edu.au](mailto:lin0286@flinders.edu.au)

Professor Yanjiang Wang  
The Third Affiliated Hospital of Army Medical University, Chongqing, China  
Email: [wayaja@163.com](mailto:wayaja@163.com)

Associate Professor Zhenfang Chen  
The First Affiliated Hospital of Army Medical University, Chongqing, China  
Email: [chen-zf@hotmail.com](mailto:chen-zf@hotmail.com)

Ms Min Wu  
The First Affiliated Hospital of Army Medical University, Chongqing, China  
Email: [Benben80925@126.com](mailto:Benben80925@126.com)

Ms Lu Mao  
The First Affiliated Hospital of Army Medical University, Chongqing, China  
Email: [maolu200517@163.com](mailto:maolu200517@163.com)

Ms Yingying Shen  
The Third Affiliated Hospital of Army Medical University, Chongqing, China  
Email: [123473534@qq.com](mailto:123473534@qq.com)

Ms Anyu Shi  
The Third Affiliated Hospital of Army Medical University, Chongqing, China  
Email: [18225218261@163.com](mailto:18225218261@163.com)

**Location:** The First Affiliated Hospital of Army Medical University, Chongqing, China  
The Third Affiliated Hospital of Army Medical University, Chongqing, China

**Declaration by Participant**

I have read the Participant Information Sheet or someone has read it to me in a language that I understand.

I understand the purposes, procedures and risks of the research described in the project.

I give permission for my intervention nurses to have access and release my medical record information and feedbacks from questionnaires with other researchers in this project, to collect, analyse, publish and report in journals and thesis. I understand this is only in the First Affiliated Hospital of Army Medical University, and the Third Affiliated Hospital of Army Medical University Chongqing, China concerning my disease and treatment for the purposes of this project. I understand that such information will remain confidential.

I understand this research forms part of the hospital's performance in research and staff development requirements.

I have had an opportunity to ask questions and I am satisfied with the answers I have received.

I freely agree to participate in this research project as described and understand that I am free to withdraw at any time during the study without affecting my future health care.

I understand that I will be given a signed copy of this document to keep.

|                                          |            |
|------------------------------------------|------------|
| Name of Participant (please print) _____ |            |
| Signature _____                          | Date _____ |

|                                                                     |            |
|---------------------------------------------------------------------|------------|
| Name of Witness* to<br>Participant's Signature (please print) _____ |            |
| Signature _____                                                     | Date _____ |

\* Witness is not to be the investigator, a member of the study team or their delegate. In the event that an interpreter is used, the interpreter may not act as a witness to the consent process. Witness must be 18 years or older.

**Declaration by Senior Researcher†**

I have given a verbal explanation of the research project, its procedures and risks and I believe that the participant has understood that explanation.

|                                                                  |            |
|------------------------------------------------------------------|------------|
| Name of Study Doctor/<br>Senior Researcher† (please print) _____ |            |
| Signature _____                                                  | Date _____ |

† A senior member of the research team must provide the explanation of, and information concerning, the research project.

**Note:** All parties signing the consent section must date their own signature.

## **Consent Form - *Adult providing own consent*** **(Family Caregivers Version)**

**Title:** A nurse-led health coaching intervention for stroke survivors and their family caregivers in hospital to home transition care in Chongqing

**Coordinating Principal Investigator/ Principal Investigator:**

A/professor Lily Xiao  
College of Nursing and Health Science, Flinders University  
Email: [lily.xiao@flinders.edu.au](mailto:lily.xiao@flinders.edu.au)

**Associate Investigator(s):**

A/Professor Diane Chamberlain  
College of Nursing and Health Science, Flinders University  
Email: [di.chamberlain@flinders.edu.au](mailto:di.chamberlain@flinders.edu.au)

PhD Candidate Shuanglan Lin  
College of Nursing and Health Science, Flinders University  
Email: [lin0286@flinders.edu.au](mailto:lin0286@flinders.edu.au)

Professor Yanjiang Wang  
The Third Affiliated Hospital of Army Medical University, Chongqing, China  
Email: [wayaja@163.com](mailto:wayaja@163.com)

Associate Professor Zhenfang Chen  
The First Affiliated Hospital of Army Medical University, Chongqing, China  
Email: [chen-zf@hotmail.com](mailto:chen-zf@hotmail.com)

Ms Min Wu  
The First Affiliated Hospital of Army Medical University, Chongqing, China  
Email: [Benben80925@126.com](mailto:Benben80925@126.com)

Ms Lu Mao  
The First Affiliated Hospital of Army Medical University, Chongqing, China  
Email: [maolu200517@163.com](mailto:maolu200517@163.com)

Ms Yingying Shen  
The Third Affiliated Hospital of Army Medical University, Chongqing, China  
Email: [123473534@qq.com](mailto:123473534@qq.com)

Ms Anyu Shi  
The Third Affiliated Hospital of Army Medical University, Chongqing, China  
Email: [18225218261@163.com](mailto:18225218261@163.com)

**Location:** The First Affiliated Hospital of Army Medical University, Chongqing, China  
The Third Affiliated Hospital of Army Medical University, Chongqing, China

**Declaration by Participant**

I have read the Participant Information Sheet or someone has read it to me in a language that I understand.

I understand the purposes, procedures and risks of the research described in the project.

I understand this research forms part of the hospital's performance in research and staff development requirements.

I have had an opportunity to ask questions and I am satisfied with the answers I have received.

I freely agree to participate in this research project as described and understand that I am free to withdraw at any time during the study.

I understand that I will be given a signed copy of this document to keep.

|                                          |            |
|------------------------------------------|------------|
| Name of Participant (please print) _____ |            |
| Signature _____                          | Date _____ |

|                                                                  |            |
|------------------------------------------------------------------|------------|
| Name of Witness* to Participant's Signature (please print) _____ |            |
| Signature _____                                                  | Date _____ |

\* Witness is not to be the investigator, a member of the study team or their delegate. In the event that an interpreter is used, the interpreter may not act as a witness to the consent process. Witness must be 18 years or older.

**Declaration by Senior Researcher†**

I have given a verbal explanation of the research project, its procedures and risks and I believe that the participant has understood that explanation.

|                                                                  |            |
|------------------------------------------------------------------|------------|
| Name of Study Doctor/<br>Senior Researcher† (please print) _____ |            |
| Signature _____                                                  | Date _____ |

† A senior member of the research team must provide the explanation of, and information concerning, the research project.

Note: All parties signing the consent section must date their own signature.
